# Supplementary material for: The SRSF4–GAS5-Glucocorticoid Receptor Axis Regulates Ventricular Hypertrophy
Source: PubMed Central journal article supplement — Circ Res. 2021 Aug 2;129(6):669–83. doi: 10.1161/CIRCRESAHA.120.318577 (PMC8409900; doi:10.1161/circresaha.120.318577), 2021-08-02
Supplement: res-129-669-s007.pdf [file res-129-669-s007.pdf]

## Major Resources Table

In order to allow validation and replication of experiments, all essential research materials listed in the Methods should be included in the Major Resources Table below. Authors are encouraged to use public repositories for protocols, data, code, and other materials and provide persistent identifiers and/or links to repositories when available. Authors may add or delete rows as needed.

### Animals (in vivo studies)

| Species      | Vendor or Source | Background Strain | Sex  | Persistent ID / URL |
|--------------|------------------|-------------------|------|---------------------|
| Mus musculus | CNIC             | C57BL/6           | M, F |                     |
|              |                  |                   |      |                     |
|              |                  |                   |      |                     |

### Genetically Modified Animals

|                            | Species      | Vendor or Source                                                  | Background Strain | Other Information | Persistent ID / URL |
|----------------------------|--------------|-------------------------------------------------------------------|-------------------|-------------------|---------------------|
| <b>SRSF floxed KO mice</b> | Mus musculus | Mouse Clinical Institute – Institut Clinique de la Souris, France | C57BL/6           | Male and female   | EMMA ID: EM: 07637  |
| Nkx2.5 CRE                 | Mus musculus | CNIC                                                              | C57BL/6           | Male and female   |                     |

### Antibodies

| Target antigen                     | Vendor or Source         | Catalog #  | Working concentration | Lot # (preferred but not required) | Persistent ID / URL |
|------------------------------------|--------------------------|------------|-----------------------|------------------------------------|---------------------|
| GAPDH                              | Abcam                    | ab8245     | 1:1000                |                                    | 6C5                 |
| GR                                 | Cell Signaling           | 3660       | 1:1000                |                                    | D8H2                |
| SRSF4                              | Novus                    | NPB2-04144 | 1:200                 |                                    | N/A                 |
| $\alpha$ -Tubulin                  | Sigma                    | T6199      | 1:3000                |                                    | DM1A                |
| Troponin I, cardiac                | Abcam                    | Ab58544    | 1:200                 |                                    | N/A                 |
| Alexa 488-labeled goat anti-rabbit | Thermo Fisher Scientific | A-11034    | 1:200                 |                                    | N/A                 |

### DNA/cDNA Clones

| Clone Name | Sequence    | Source / Repository | Persistent ID / URL |
|------------|-------------|---------------------|---------------------|
| SRSF4      | NM_005626.3 | Origene             | SC116596            |
| GAS5       | NR_002578   | abm                 | ORF020064           |
|            |             |                     |                     |

### Cultured Cells

| Name                    | Vendor or Source | Sex (F, M, or unknown) | Persistent ID / URL |
|-------------------------|------------------|------------------------|---------------------|
| Neonatal cardiomyocytes | CNIC             | F + M                  |                     |
|                         |                  |                        |                     |
|                         |                  |                        |                     |

### Data & Code Availability

| Description                           | Source / Repository | Persistent ID / URL                                                                                             |
|---------------------------------------|---------------------|-----------------------------------------------------------------------------------------------------------------|
| Scripts used for analyses and figures | CNIC/Bitbucket      | <a href="https://bitbucket.org/cmartiga/srsf4_ko_analysis">https://bitbucket.org/cmartiga/srsf4_ko_analysis</a> |

DOI [to be added]

|                                 |                     |                                                                                 |
|---------------------------------|---------------------|---------------------------------------------------------------------------------|
| iCount package                  | Frankfurt U./iCount | <a href="http://icount.biolab.si">http://icount.biolab.si</a>                   |
| iCLIP analysis codes            | Frankfurt U./GitHub | <a href="https://github.com/tomazc/iCount">https://github.com/tomazc/iCount</a> |
| Cushing's syndrome RNA-seq data | GEO                 | GSE66446                                                                        |

**Other**

| Description | Source / Repository | Persistent ID / URL |
|-------------|---------------------|---------------------|
|             |                     |                     |
|             |                     |                     |
|             |                     |                     |
